# Supplementary material
Source: publisher figshare collection journal article supplement (https://frontiersin.figshare.com/ndownloader/files/13744211)
Supplement: Supplementary file 1 [file 13744211]

**Supplementary Table 4: Corrected cell length (µm) from longitudinal sections.** Significant differences between the steady (S), unreleased (U), and released (R) state are provided based on the T- or U-test; P≤0.005 (bold); abbreviations according to Tab. S3.

|  |  |  |  |  |  |  |  |  |  | |  |
| --- | --- | --- | --- | --- | --- | --- | --- | --- | --- | --- | --- |
| **Sector** | **State** | **N** | **Mean** | **se** | **Median** | **K-S-Test** | **Sig.** | **Tested groups** | **df** | **T-test or U-Test** |
| E | S | 62 | 49.95 | 1.47 | 48.51 | 0.077 | 0.200 | S / U | 91.913 | **T = -3.960; P = 0.000** |
|  | U | 51 | 60.16 | 2.12 | 59.09 | 0.113 | 0.113 | U / R | 51/66 | **U = 791; P = 0.000** |
|  | R | 66 | 46.68 | 1.29 | 44.33 | 0.162 | **0.000** | R / S | 66/62 | U = 1653; P = 0.061 |
| SE | S | 43 | 67.77 | 2.34 | 65.33 | 0.099 | 0.200 | S / U | 80 | **T = -3.690; P = 0.000** |
|  | U | 39 | 82.80 | 3.41 | 81.76 | 0.128 | 0.106 | U / R | 75 | **T = 2.645; P = 0.010** |
|  | R | 38 | 71.27 | 2.69 | 67.58 | 0.11 | 0.200 | R / S | 79 | T = 0.985; P = 0.328 |
| 1 | S | 48 | 96.25 | 3.49 | 95.65 | 0.119 | 0.085 | S / U | 102 | **T = 3.505; P = 0.001** |
|  | U | 56 | 113.73 | 3.52 | 111.55 | 0.073 | 0.200 | U / R | 110 | **T = 5.620; P = 0.000** |
|  | R | 56 | 88.35 | 2.84 | 85.75 | 0.081 | 0.200 | R / S | 102 | T = -1.775; P = 0.079 |
| 2 | S | 46 | 135.28 | 7.36 | 122.84 | 0.139 | **0.027** | S / U | 46/49 | U = 988; P = 0.301 |
|  | U | 49 | 146.28 | 7.74 | 131.28 | 0.132 | **0.032** | U / R | 49/16 | U = 361; P = 0.637 |
|  | R | 16 | 144.69 | 8.63 | 148.90 | 0.134 | 0.200 | R / S | 16/46 | U = 293; P = 0.228 |
| 3 | S | 65 | 136.43 | 5.47 | 130.97 | 0.119 | **0.022** | S / U | 65/104 | **U = 2264; P = 0.000** |
|  | U | 104 | 114.31 | 3.30 | 107.01 | 0.101 | **0.011** | U / R | 104/71 | **U = 2451; P = 0.000** |
|  | R | 71 | 135.41 | 4.76 | 125.60 | 0.117 | **0.018** | R / S | 71/65 | U = 2280; P = 0.905 |
| 4 | S | 150 | 90.44 | 1.76 | 86.08 | 0.088 | **0.007** | S / U | 176/150 | U = 12337; P = 0.309 |
|  | U | 176 | 92.32 | 1.68 | 90.59 | 0.052 | 0.200 | U / R | 286 | **T = -4.801; P = 0.000** |
|  | R | 112 | 106.18 | 2.47 | 103.63 | 0.076 | 0.139 | R / S | 112/150 | **U = 5353; P = 0.000** |
| 5 | S | 174 | 88.42 | 1.61 | 84.77 | 0.078 | **0.012** | S / U | 174/190 | U = 15630; P = 0.369 |
|  | U | 190 | 86.76 | 1.61 | 85.38 | 0.071 | **0.020** | U / R | 190/136 | **U = 8248; P = 0.000** |
|  | R | 136 | 105.07 | 2.51 | 103.46 | 0.079 | **0.038** | R / S | 136/174 | **U = 7902; P = 0.000** |
| 6 | S | 192 | 77.21 | 1.38 | 73.84 | 0.078 | **0.007** | S / U | 192/205 | U = 19286; P = 0.730 |
|  | U | 205 | 77.77 | 1.33 | 74.93 | 0.066 | **0.030** | U / R | 205/136 | **U = 5245; P = 0.000** |
|  | R | 136 | 106.80 | 2.25 | 101.91 | 0.091 | **0.008** | R / S | 136/192 | **U = 4756; P = 0.000** |
| 7 | S | 205 | 73.14 | 1.21 | 70.42 | 0.072 | **0.012** | S / U | 205/207 | U = 20006; P = 0.316 |
|  | U | 207 | 74.82 | 1.30 | 73.78 | 0.058 | 0.086 | U / R | 285.803 | **T = -11.622; P = 0.000** |
|  | R | 153 | 101.27 | 1.87 | 98.10 | 0.065 | 0.200 | R / S | 153/205 | **U = 5131; P = 0.000** |
| 8 | S | 173 | 76.77 | 1.40 | 73.35 | 0.097 | **0.000** | S / U | 173/215 | U = 18589; P = 0.994 |
|  | U | 215 | 76.32 | 1.24 | 73.80 | 0.068 | **0.019** | U / R | 215/138 | **U = 5930; P = 0.000** |
|  | R | 138 | 103.36 | 2.24 | 99.77 | 0.085 | **0.015** | R / S | 138/173 | **U = 4918; P = 0.000** |
| 9 | S | 143 | 80.21 | 1.46 | 78.68 | 0.071 | 0.072 | S / U | 143/179 | U = 12114; P = 0.410 |
|  | U | 179 | 78.97 | 1.41 | 75.21 | 0.085 | **0.003** | U / R | 179/99 | **U = 3241; P = 0.000** |
|  | R | 99 | 111.12 | 2.99 | 106.01 | 0.088 | 0.056 | R / S | 144.577 | **T = 9.299; P = 0.000** |
| 10 | S | 104 | 90.88 | 2.00 | 87.80 | 0.09 | **0.039** | S / U | 104/115 | U = 5078; P = 0.054 |
|  | U | 115 | 85.84 | 1.96 | 82.02 | 0.097 | **0.010** | U / R | 115/45 | **U = 711; P = 0.000** |
|  | R | 45 | 125.31 | 4.48 | 118.31 | 0.123 | 0.084 | R / S | 45/104 | **U = 772; P = 0.000** |
|  |  |  |  |  |  |  |  |  |  |  |
